# Supplementary material for: Evidence of Heritability in Prebiotically Realistic Membrane-Bound Systems
Source: MDPI journal article supplement (doi:10.3390/life14030284), 2024-02-20
Supplement: s1 [file s1]

## Supplementary Materials

### Evidence of heritability in prebiotically realistic membrane-bound systems

*Tymofii Sokolskyi<sup>1,2</sup>, Pavani Ganju<sup>1,2</sup>, Ronan Montgomery-Taylor<sup>1,2</sup>, David Baum<sup>1,2</sup>*

1 – Wisconsin Institute for Discovery, University of Wisconsin-Madison, Madison, WI 53715, USA

2 – Department of Botany, University of Wisconsin-Madison, Madison, WI 53706, USA

### Enriched Prebiotic Soup (EPS) preparation

Compounds in concentrations listed in Table S1, with the exceptions of ammonium persulfate (APS) and sodium trimetaphosphate (TMP), were mixed in a glass beaker and then dissolved in 1L of water with stirring. Resulting solution was dispensed into 50 mL plastic tubes and stored at -20°C until use. Immediately prior to experimental use, EPS stocks were thawed, filtered through a 200 nm syringe filter (431215, DOT Scientific Inc., Burton, USA) and TMP and APS were added to appropriate final concentrations.

| Compound                      | Class                 | Vendor            | CAS #      | Final Concentration (mM) |
|-------------------------------|-----------------------|-------------------|------------|--------------------------|
| 1,3-dihydroxyacetone          | Triose                | Fisher Scientific | 96-26-4    | 0.32                     |
| 2-aminobutyric acid           | Amino Acid            | Acros Organics    | 2835-81-6  | 0.08                     |
| acetic acid                   | Organic Acid          | Sigma-Aldrich     | ?          | 0.32                     |
| acetoguanamine                | Triazine              | VWR               | 541-02-9   | 0.16                     |
| adenine                       | Nucleobase            | Fisher Scientific | 73-24-5    | 0.32                     |
| ammonium chloride             | Salt/Redox Energy     | Sigma-Aldrich     | 12125-02-9 | 20                       |
| ammonium persulfate**         | Salt/Oxidant          | IBI Scientific    | 7727-54-0  | 0.04                     |
| butyric acid (sodium salt)    | Organic Acid          | Fisher Scientific | 156-54-7   | 0.08                     |
| cobalt(II) chloride anhydrous | Transition Metal Salt | BTC Chemicals     | 7646-79-9  | 0.001                    |
| copper(II) chloride dihydrate | Transition Metal Salt | Alfa Aesar        | 10125-13-0 | 0.001                    |
| cytosine                      | Nucleobase            | Fisher Scientific | 71-30-7    | 0.32                     |
| D-(-)-ribose                  | Monosaccharide        | Fisher Scientific | 50-69-1    | 0.16                     |
| D-(+)-xylose                  | Monosaccharide        | Fisher Scientific | 58-86-6    | 0.16                     |

|                     |                         |                     |           |      |
|---------------------|-------------------------|---------------------|-----------|------|
| D-glucose           | Monosaccharide          | DOT Scientific Inc. | 54-99-7   | 0.16 |
| DL-arabinose        | Monosaccharide          | VWR                 | 147-81-9  | 0.16 |
| formic acid 90%     | Organic Acid            | Aqua Solutions      | 64-18-6   | 0.64 |
| glycerol            | Trihydric Alcohol       | DOT Scientific Inc. | 56-81-5   | 0.32 |
| glycolic acid       | $\alpha$ -Hydroxy Acid  | Acros Organics      | 79-14-1   | 0.32 |
| hydroxybutyric acid | $\beta$ -Hydroxy Acid   | Sigma-Aldrich       | 150-83-4  | 0.08 |
| iminodiacetic acid  | Dicarboxylic Acid Amine | VWR                 | 142-73-4  | 0.16 |
| L-alanine           | Amino Acid              | VWR                 | 56-41-7   | 0.32 |
| L-arginine          | Amino Acid              | Sigma-Aldrich       | 74-79-3   | 0.16 |
| L-ascorbic acid     | Reducing Agent/Cofactor | DOT Scientific Inc. | 50-81-7   | 0.04 |
| L-asparagine        | Amino Acid              | Acros Organics      | 5794-13-8 | 0.16 |
| L-aspartic acid     | Amino Acid              | Alfa Aesar          | 56-84-8   | 0.32 |
| L-cysteine          | Amino Acid              | DOT Scientific Inc. | 52-90-4   | 0.16 |
| L-glutamic Acid     | Amino Acid              | VWR                 | 56-86-0   | 0.32 |
| L-glutamine         | Amino Acid              | Sigma-Aldrich       | 56-85-9   | 0.16 |
| L-glycine           | Amino Acid              | Sigma-Aldrich       | 54-40-6   | 0.32 |
| L-histidine         | Amino Acid              | DOT Scientific Inc. | 71-00-1   | 0.08 |
| L-isoleucine        | Amino Acid              | DOT Scientific Inc. | 73-32-5   | 0.16 |
| L-leucine           | Amino Acid              | DOT Scientific Inc. | 61-90-5   | 0.32 |
| L-lysine            | Amino Acid              | DOT Scientific Inc. | 657-27-2  | 0.32 |
| L-methionine        | Amino Acid              | DOT Scientific Inc. | 63-68-3   | 0.08 |
| L-phenylalanine     | Amino Acid              | DOT Scientific Inc. | 63-91-2   | 0.16 |
| L-proline           | Amino Acid              | Alfa Aesar          | 147-85-3  | 0.16 |
| L-serine            | Amino Acid              | DOT Scientific Inc. | 56-45-1   | 0.32 |
| L-threonine         | Amino Acid              | DOT Scientific Inc. | 72-19-5   | 0.32 |
| L-tryptophan        | Amino Acid              | DOT Scientific Inc. | 73-22-3   | 0.08 |

|                              |                        |                     |            |       |
|------------------------------|------------------------|---------------------|------------|-------|
| L-tyrosine                   | Amino Acid             | Amresco             | 60-18-4    | 0.16  |
| L-valine                     | Amino Acid             | DOT Scientific Inc. | 72-18-4    | 0.32  |
| lactic acid 88% solution     | $\alpha$ -Hydroxy Acid | Fisher Scientific   | 50-21-5    | 0.16  |
| magnesium chloride           | Sea Salt               | DOT Scientific In.  | 7791-18-6  | 50    |
| N-ethanolamine               | Amino Alcohol          | Sigma-Aldrich       | 141-43-5   | 0.08  |
| N-methylalanine              | Amino Acid             | Sigma-Aldrich       | 3913-67-5  | 0.08  |
| N-methylglycine              | Amino Acid Derivative  | Acros Organics      | 107-97-1   | 0.16  |
| N-methylurea                 | Amide                  | Fisher Scientific   | 759-73-9   | 0.08  |
| nicotinamide                 | Cofactor               | DOT Scientific Inc. | 98-92-0    | 0.08  |
| potassium chloride           | Sea Salt               | VWR                 | 7447-40-7  | 10    |
| propionic acid               | Organic Acid           | Fisher Scientific   | 79-09-4    | 0.16  |
| pyruvic acid                 | $\alpha$ -Keto Acids   | Fisher Scientific   | 127-17-3   | 0.08  |
| R-pantetheine                | Cofactor               | Sigma-Aldrich       | 496-65-1   | 0.04  |
| sodium bisulfite             | Reducing agent         | Ward's              | 7631-90-5  | 0.08  |
| sodium chloride              | Sea Salt               | Fisher Scientific   | 7647-14-5  | 500   |
| sodium molybdate             | Transition Metal Salt  | Strem Chemicals     | 10102-40-6 | 0.001 |
| sodium nitrate               | Salt                   | Sigma-Aldrich       | 7631-99-4  | 20    |
| succinic acid                | Dicarboxylic Acid      | Sigma-Aldrich       | 110-15-6   | 0.08  |
| succinonitrile               | Nitrile                | VWR                 | 110-61-2   | 0.16  |
| thymine                      | Nucleobase             | Fisher Scientific   | 65-71-4    | 0.32  |
| trisodium trimetaphosphate** | Phosphate Source       | Sigma-Aldrich       | 7785-84-4  | 0.1   |
| uracil                       | Nucleobase             | VWR                 | 66-22-8    | 0.32  |
| urea                         | Amide                  | IBI Scientific      | 57-13-6    | 0.16  |
| zinc(II) chloride            | Transition Metal Salt  | Sigma-Aldrich       | 7646-85-7  | 0.001 |

|                                    |                       |                |           |       |
|------------------------------------|-----------------------|----------------|-----------|-------|
| $\beta$ -alanine                   | Amino Acid            | Tokyo Chemical | 107-95-9  | 0.32  |
| iron (II) chloride                 | Transition Metal Salt | Alfa Aesar     | 7758-94-3 | 0.001 |
| manganese (II) sulfate monohydrate | Transition Metal Salt | Sigma-Aldrich  | 7487-88-9 | 0.001 |

**Table S1.** EPS composition. \*\* indicates compounds that were added immediately prior to use (TMP and APS).

**Effect of sonication time on vesicle size and NR fluorescence.** To test whether vesicle lamellarity is a contributing factor to changes in NR fluorescence and size, we measured vesicle solutions in water without Triton, sonicated for different times. Since sonication time is expected to be inversely proportional to lamellarity (Maurer et al., 2018), we predicted a decline in NR fluorescence with sonication. As predicted, NR fluorescence drops after ~4 minutes of sonication and remains stable for the duration of the time-course (**Fig. S1, A**). Similarly, vesicle size distribution of unsonicated vesicles suggests a larger size than vesicles sonicated for 10 minutes (**Fig. S1, B**).

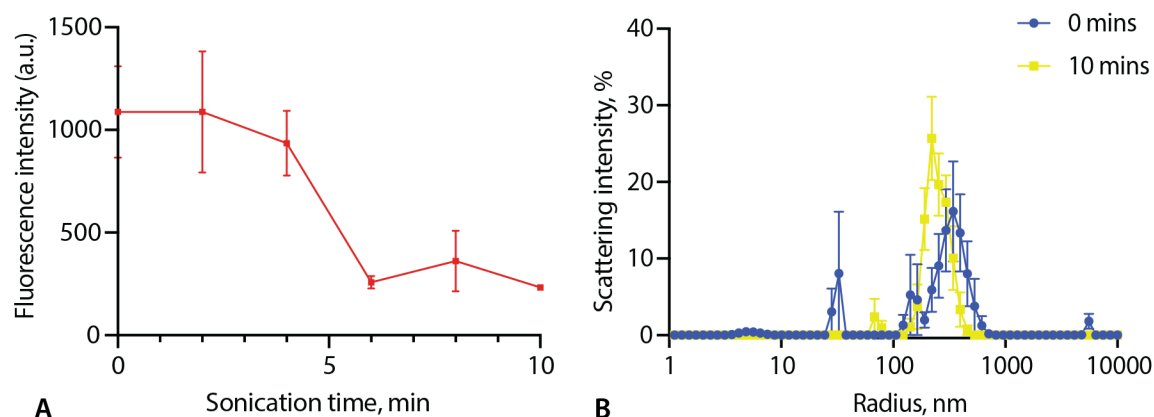

**Figure S1.** Results of the 10 minute sonication test on vesicles composed of 20 mM 1:1 DA:DN in water. **A** – Nile Red fluorescence intensity over sonication time; **B** – size distributions of unsonicated and sonicated vesicles. Error bars are standard error (12 replicates for **A**, 3 replicates for **B**).

**Table S2.** p-values derived from a two-tailed heteroscedastic t-test comparing raw NTC and TR NR fluorescence intensity values of samples containing Triton X-100 in either EPS or water.

| Generation | EPS        | Water       |
|------------|------------|-------------|
| 1          | 0.00055171 | 0.153476769 |
| 2          | 0.00491489 | 0.579675521 |
| 3          | 0.16115933 | 0.6836678   |
| 4          | 0.11314095 | 0.002685796 |
| 5          | 0.21314719 | 0.000592203 |
| 7          | 0.00855078 | 0.007956636 |
| 8          | 0.009686   | 0.381839385 |
| 9          | 0.17410591 | 2.91172E-07 |
| 10         | 0.17949402 | 0.095197113 |
| 11         | 0.76135622 | 0.001002305 |
| 12         | 0.41611784 | 0.866752562 |
| 13         | 0.21922503 | 0.886798447 |
| 14         | 0.31832474 | 0.379641724 |
| 16         | 0.09234096 | 0.286683154 |
| 17         | 0.9716847  | 0.020788254 |
| 18         | 0.55434033 | 0.001030556 |
| 20         | 0.00183984 | 0.044239599 |
| 21         | 0.07552436 | 0.099381047 |
| 23         | 0.27278224 | 0.049111401 |
| 25         | 0.39111247 | 0.007031338 |
| 26         | 0.99117549 | 0.104085514 |
| 27         | 0.59941244 | 0.000388879 |
| 28         | 0.41574193 | 0.903164937 |
| 29         | 0.00295851 | 0.793949012 |
| 30         | 0.59977185 | 0.115396303 |

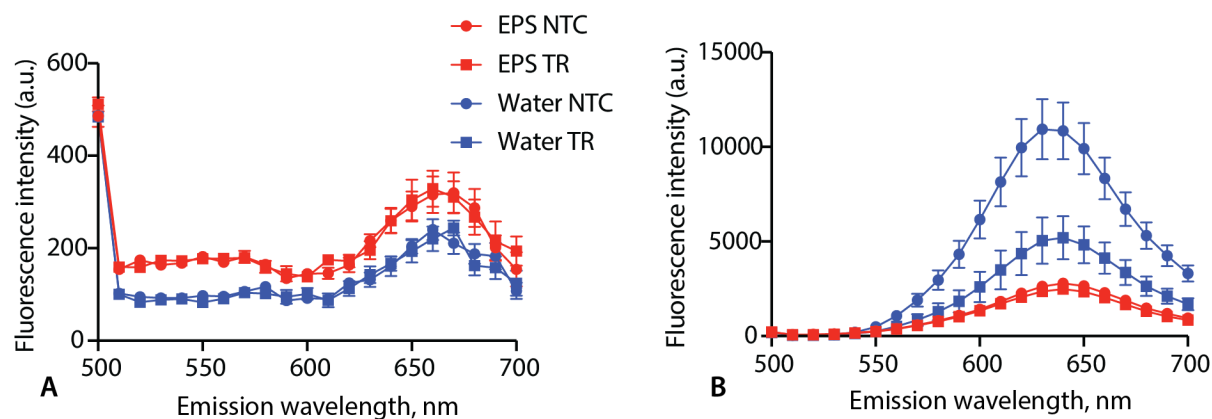

**Figure S2.** Comparison between Nile Red fluorescence emission spectra with 480 nm excitation wavelength for samples without (A) and with (B) Triton X-100 at generation 25. Note extremely low fluorescence of samples without the detergent. Error bars are standard error (12 replicates).

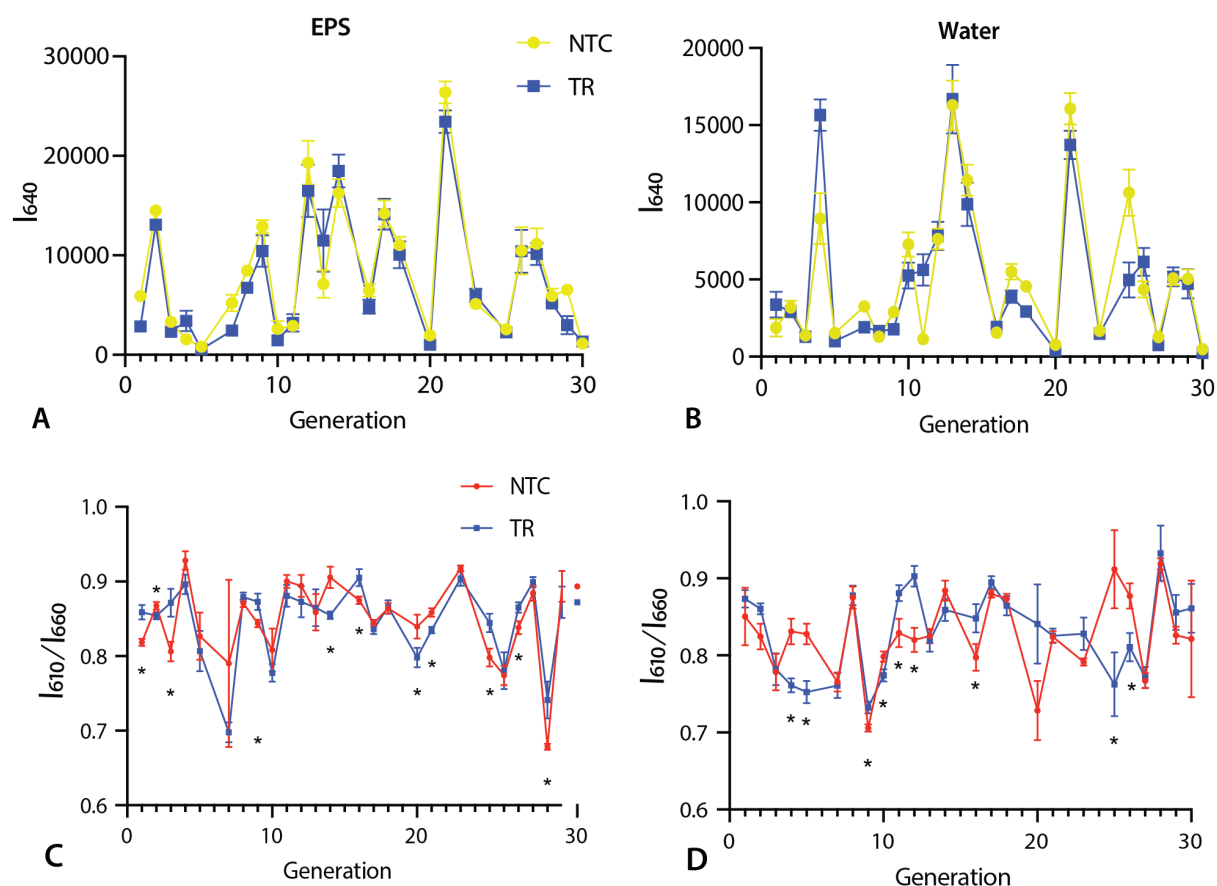

**Figure S3.** Raw NR fluorescence intensity plots for NTCs and TRs of EPS and water samples with Triton. **A** –  $I_{640}$  for EPS samples over 30 generations; **B** – water samples; **C** –  $I_{610}/I_{660}$  for EPS; **D** –  $I_{610}/I_{660}$  for water. Error bars are standard error (12 replicates).

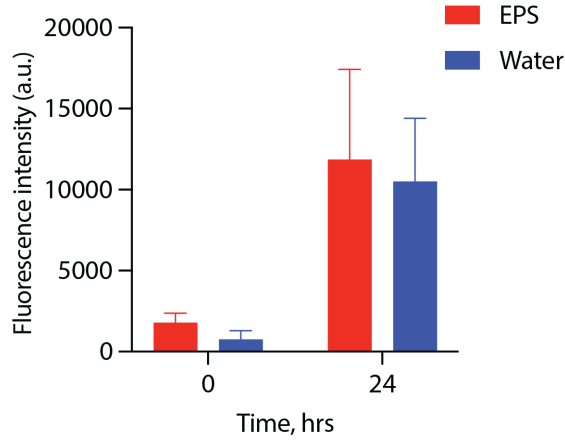

**Figure S4.** Comparison between Nile Red fluorescence emission spectra with 480 nm excitation and 640 nm emission wavelengths for 20 mM 1:1 DA:DN with 0.05% Triton samples incubated in water or EPS for 0 and 24 hours. Error bars are standard error (16 replicates).

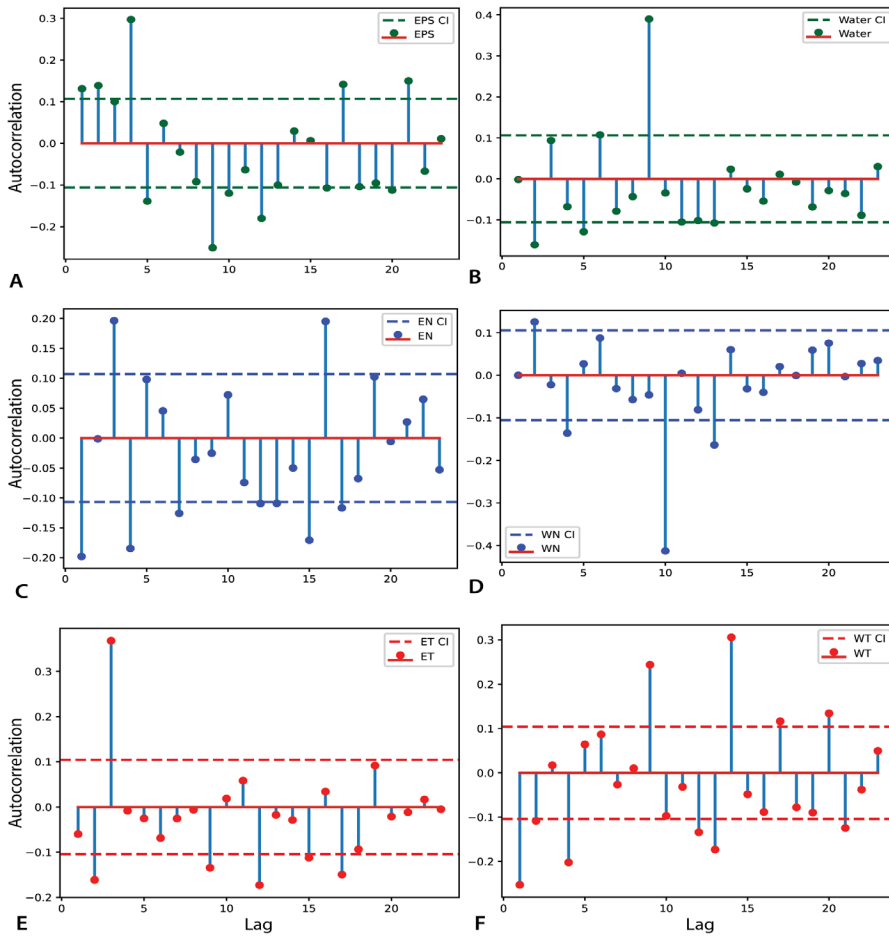

**Figure S5.** Autocorrelation function (ACF) values for the 12-replicate Triton samples over 25 generations with 95% confidence intervals. **A–B:** ACF plots for the NR fluorescence TR/NTC ratios of EPS (**A**) and water (**B**) samples; **C–F:** ACF plots for the raw NR Fluorescence of EPS NTCs

(C), Water NTCs (E), EPS TRs (E), and Water TRs (F). Python code for this analysis is attached separately.

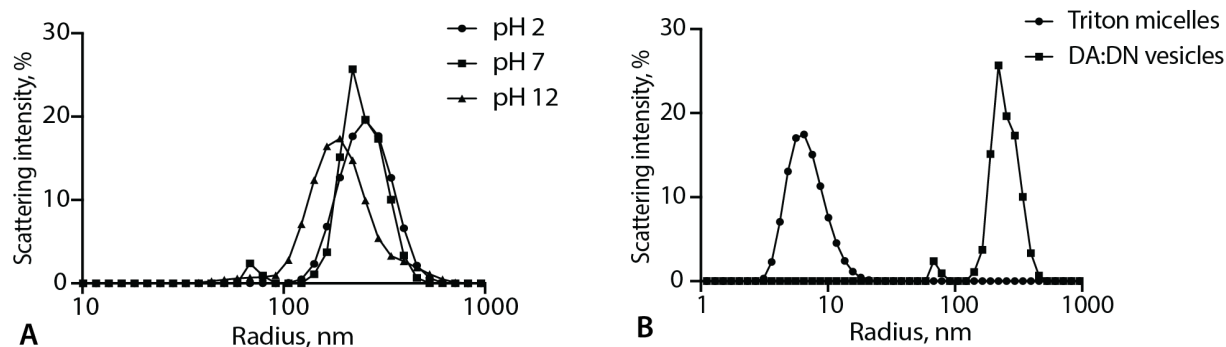

**Figure S6.** **A** – size distributions of 20 mM 1:1 DA:DN vesicles at pH 2, 7 and 12 that demonstrates lack of micelles or large particles in acidic and basic samples (1 replicate). **B** – comparison between the sizes of pure 0.05% Triton X-100 micelles and DA:DN vesicles (1 replicate).

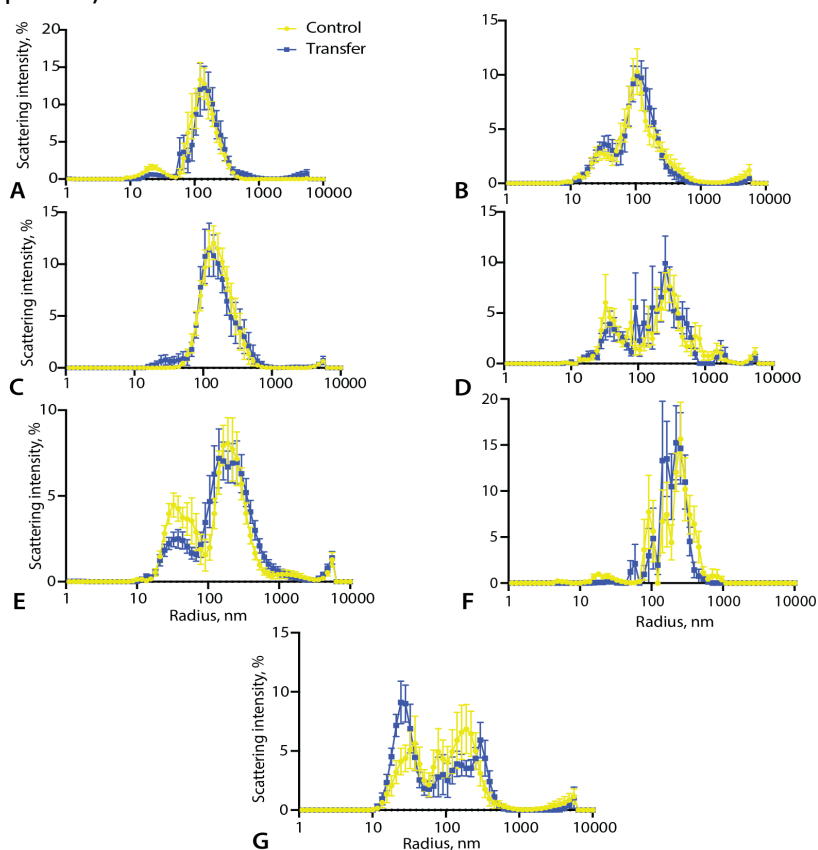

**Figure S7.** Size distributions of samples containing Triton X-100: **A** – generation 5, EPS; **B** – generation 5, water; **C** – generation 10, EPS; **D** – generation 10, water; **E** – generation 20, water; **F** – generation 25, EPS; **G** – generation 25, water. Error bars are standard error (10 replicates).



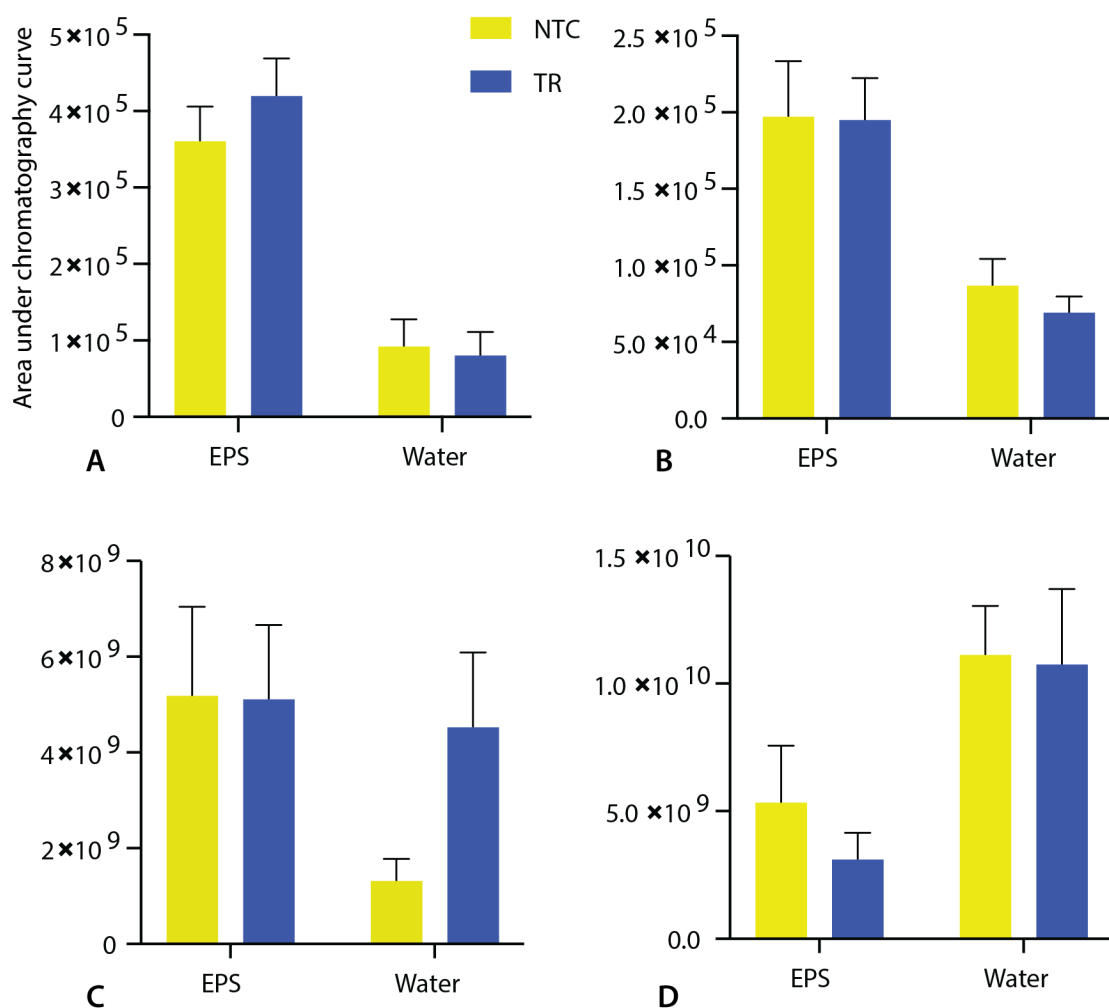

**Figure S8.** Relative abundance of amphiphiles as measure by LC peak area under the curve for samples without Triton X-100. **A** – DA, generation 25; **B** – DA, generation 30; **C** – DN, generation 25; **D** – DN, generation 30. No significant differences between TRs and NTCs are observed. Error bars are standard error (12 replicates).
